# Supplementary material for: Heat Source Model Development for Thermal Analysis of Laser Powder Bed Fusion Using Bayesian Optimization and Machine Learning
Source: Springer Nature journal article supplement (doi:10.1007/s40192-023-00334-2), 2024-01-19
Supplement: MOESM1 [file 26646068]

**Supplementary Material for:**

**Heat source model development for thermal analysis of laser powder bed fusion using Bayesian optimization and machine learning**

- Journal name: Integrating Materials and Manufacturing Innovation
- Author names: Masahiro Kusano\* and Makoto Watanabe
- Affiliations: Research Center for Structural Materials, National Institute for Materials Science, 1-2-1 Sengen, Tsukuba, 305-0047, Ibaraki, Japan
- E-mail address of the corresponding author: [KUSANO.Masahiro@nims.go.jp](mailto:KUSANO.Masahiro@nims.go.jp)

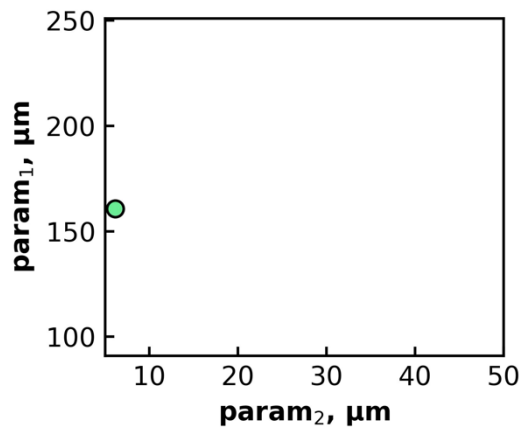

S1 Movie of  $h$  ( $\text{param}_1$ ) against  $r_i$  ( $\text{param}_2$ ) through the iterative calibration procedure for the conical heat source model

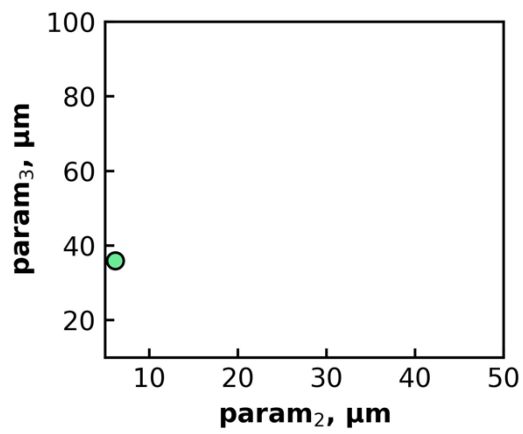

S2 Movie of  $r_e$  ( $\text{param}_3$ ) against  $r_i$  ( $\text{param}_2$ ) through the iterative calibration procedure for the conical heat source model

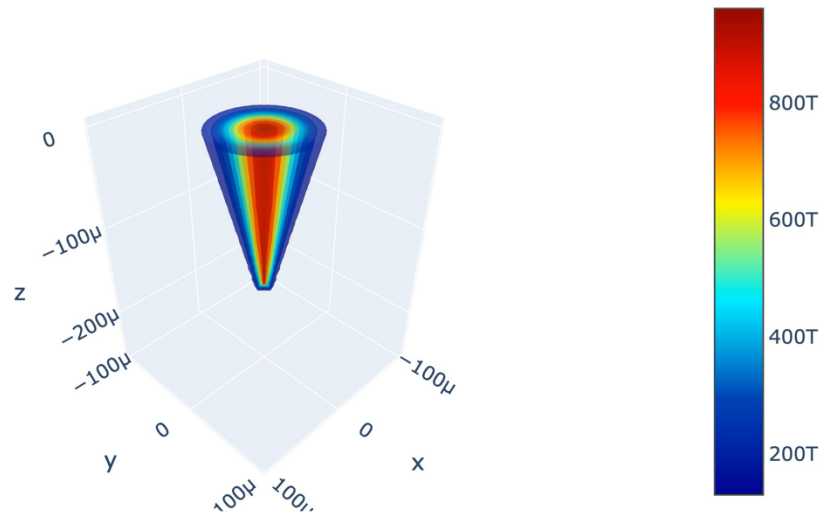

**S3** Movie of volumetric heat flux of the conical heat source model through the iterative calibration procedure

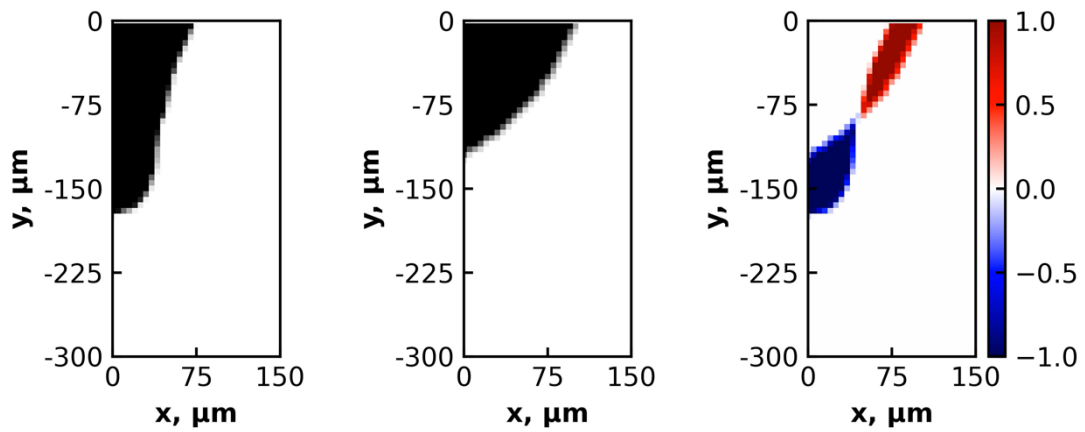

**S4** Movie of  $FZ_{obs}$  (left),  $FZ_{sim}$  (middle), and their difference (right) through the iterative calibration procedure

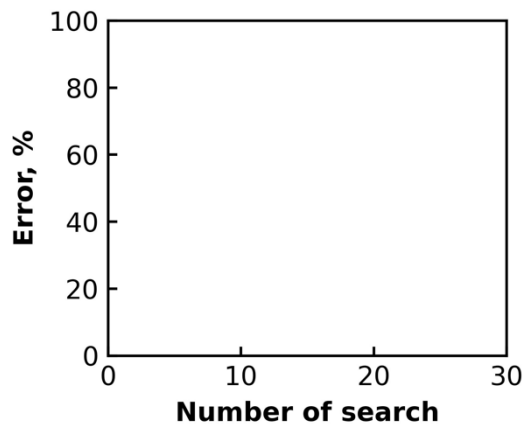

**S5** Movie of the simulation error against the number of search through the iterative calibration procedure

(a) Conical model

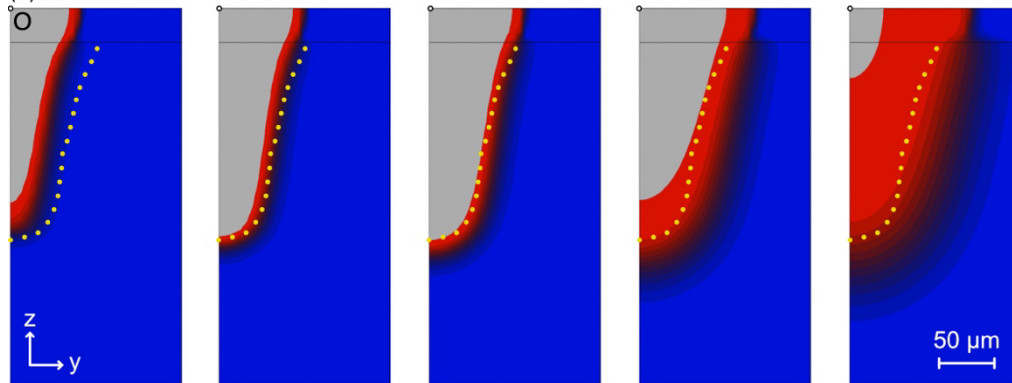

(b) Linearly decaying model

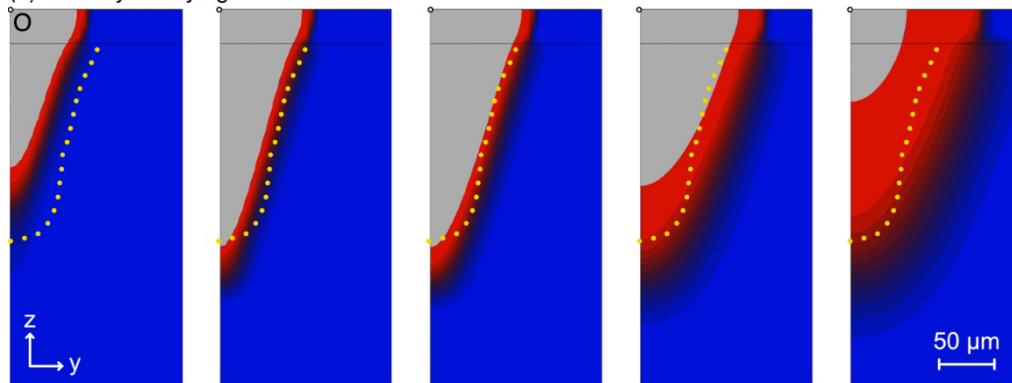

(c) Exponentially decaying model

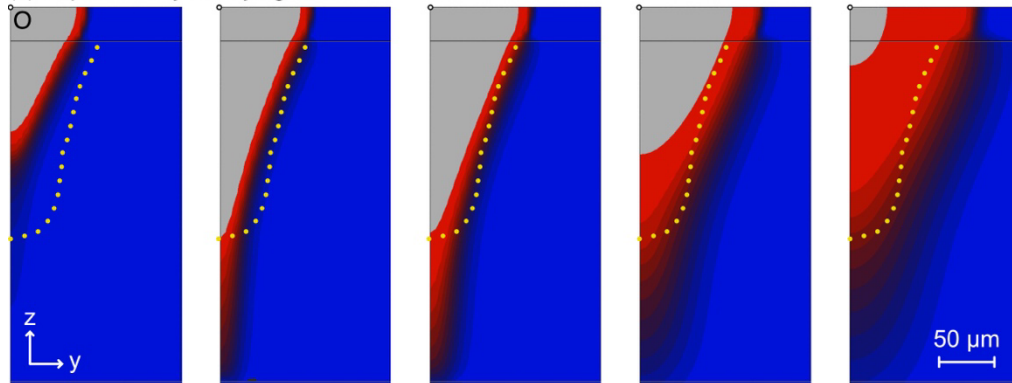

(b) Double ellipsoidal model

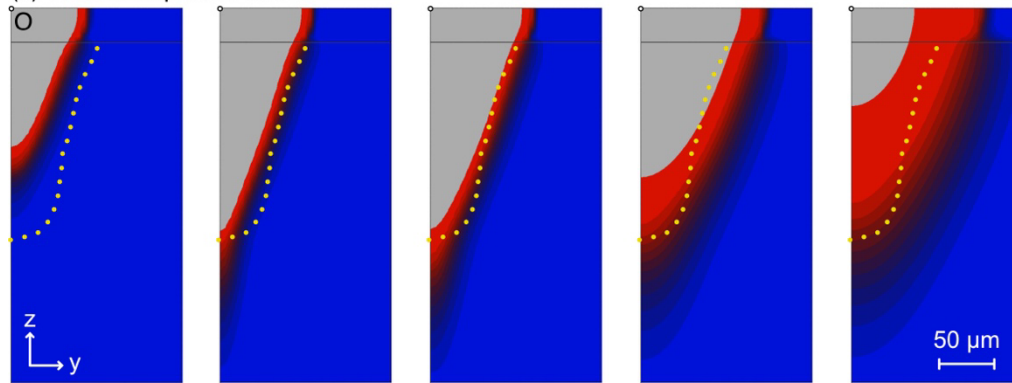

$t = 0.18$  ms

$t = 0.20$  ms

$t = 0.22$  ms

$t = 0.30$  ms

$t = 0.40$  ms

Temperature, °C

|    |       |       |      |      |
|----|-------|-------|------|------|
| 25 | 355.8 | 686.5 | 1017 | 1348 |
|----|-------|-------|------|------|

● ● ● Outline of the fusion zone from the bead-on-plate test

**S6** Temperature distributions at  $P = 400$  W and  $v = 1000$  mm/s simulated by the thermal analysis with (a) the conical, (b) linearly decaying, (c) exponentially decaying, and (b) double ellipsoidal heat source models with the calibrated shape parameters. The center of the heat source model is on the plane at  $t = 0.20$  ms. The yellow dotted lines represent the outline of the fusion zone from the bead-on-plate test.
